1 **Impact of Dental Disorders on Self-rated dental Health Status of the Elderly in Selected**  
2 **Rural Communities in Kenya**

3 **Walter Ogutu Amulla<sup>1\*</sup>, Fletcher Njororai<sup>2</sup>**

4 <sup>1</sup>Kisii University, Department of Public Health, Kisii University; 408-  
5 40200, Kisii,  
6 Kenya; [wogutu@kisiiversity.ac.ke](mailto:wogutu@kisiiversity.ac.ke)

7  
8 <sup>2</sup>The University of Texas at Tyler, Department of Public Health. The  
9 University of Texas at Tyler, Tyler, TX 75799, USA.

10  
11 \*Corresponding author: [wogutu@kisiiversity.ac.ke](mailto:wogutu@kisiiversity.ac.ke)

31

## 32 Abstract

33 Low prioritization of oral care for the elderly and inadequacy of resources results in high  
34 prevalence of dental disorders in this population in most African countries. This study aimed at  
35 assessing the impact of self-rated dental health among the elderly in Kenya. A cross-sectional  
36 quantitative study was conducted among 300 subjects in parts of Karachuonyo sub-county of  
37 Homa Bay County, Kenya. The sample size was determined using Yamane's formula based on a  
38 study population of 1159. Data was collected through interviewer-administered questionnaires.  
39 Majority (64%) of the respondents were aged 65-74 years. Female respondents were more  
40 (55.3%) than males (44.75). Further, 8 in 10 of the study sample never had any formal  
41 employment with nearly the same proportion (79.3%) self-rating their economic status as poor.  
42 Nearly 7 out of 10 (67%) respondents had lost at least one tooth due to medical extraction  
43 whereas half of the respondents (52.3%) were having at least one carious tooth at the time of data  
44 collection. Tooth loss had the strongest impact on self-rated dental health ( $X^2=27.818$ ,  
45  $p<0.00001$ ,  $\phi = 0.305$ ) followed by tooth mobility ( $X^2=27.180$ ,  $p<0.00001$ ,  $\phi = 0.301$ ), gingival  
46 bleeding ( $X^2=19.378$ ,  $p=0.000011$ ,  $\phi = 0.254$ ) and cavities ( $X^2=17.757$ ,  $p=0.000025$ ,  $\phi =$   
47  $0.243$ ). The study established that dental disorders significantly but disproportionately impacted  
48 self-rated dental health of the elderly, with tooth loss being the leading disorder. Increasing  
49 provision of services for the elderly for dental health needs is critical in Kenya as in most  
50 African countries.

51 **Key words:** Elderly, dental health, oral health, Kenya, sub-Saharan Africa.

52

53

54

55

56

57

58

59

60

61

62

## 63 **Introduction**

64 The proportion of elderly population continues to rise globally with a remarkable shift of the  
65 increases towards low- and middle-income countries [1]. This demographic transition  
66 necessitates a shift of focus for public health systems to r identify and address the needs of this  
67 growing elderly population. Whereas in high income countries (HICs) this is well addressed in  
68 many ways, for low- and middle-income countries (LMICs), the ongoing demographic transition  
69 has largely led to increased morbidity in this population segment [2]. Unmet health needs affect  
70 the quality of life as well as life expectancy for the older adults, many of whom may be suffering  
71 multi-morbidities [3, 4]. According to the World Health Organization [5], around 70% of sub-  
72 Saharan Africa countries spent less than US\$ 1 per person per year on treatment costs for oral  
73 health care in 2019, the latest year for which data is available.

74 In literature, there is no universal cut-off age for the elderly. Although both the United Nations  
75 and the WHO recommend 60 years plus, others use lower age since the cut-off depends on life  
76 expectancy [4, 6]. The Kenya bureau of statistics (KNBS) characterized those aged 65 plus years  
77 as elderly [7]. Therefore this study used 65 years and above as constituting the elderly  
78 population.

79 Among the leading morbidities that the elderly in LMICs have had to contend with are oral and  
80 dental disorders. These disorders, largely of teeth and gums, include dental caries, periodontal  
81 disease, dental trauma, dental pain, tooth mobility and tooth loss [8]. Previous studies across the  
82 globe have reported varying but high prevalence of these dental disorders among the elderly.  
83 Agrawal et al. [9] reported a dental caries prevalence of 41.9% among elderly Indians whereas  
84 Kohli et al. [10], reported a tooth loss prevalence of 35% among the elderly in Oregon, United

85 States. Additionally, a survey conducted in China reported varying prevalence of periodontal  
86 disease with gum bleeding prevalence at 88% and calculus at over 95% among persons aged 65-  
87 74 years [11].

88 The African elderly population is particularly affected by poor dental health for various reasons.  
89 Low prioritization of oral care for the elderly and inadequacy of resources has resulted in dental  
90 disorders being more prevalent among the elderly in most African countries compared with other  
91 age-groups, yet there are very few preventive care programs for them and/or tailored for their  
92 age-specific needs [12, 13, 14, 15]. For instance, a study among elderly dental patients in Japan  
93 reported tooth mobility prevalence of 17% [16], whereas a related study in Sudan reported tooth  
94 mobility prevalence of 91% among cases and 53% among controls [12]. Additionally, while  
95 most elderly people live in rural areas as most of the Kenyan population, 85%, live in rural areas,  
96 dental facilities are mainly found in urban centers and, as opposed to HICs, few social security  
97 and retirement programs exist in Africa for health insurance [14, 17]. Also, most of the elderly  
98 people may not have worked in formal employment or even worked at all in paid employment all  
99 their lives, and many are living in abject poverty [18]. Many of the elderly will also be living  
100 alone, after losing their spouse and the generational differences marginalizes them from the rest  
101 of the household which exacerbates their health needs in general [19, 20].

102 In Kenya, as in other African countries, dental disorders remain a leading public health concern  
103 among the elderly particularly in rural areas. A study by Crouch and colleagues [21] reported  
104 that all (100%) of the elderly people above 65years had experienced dental pain in the past with  
105 83% of the participants suffering dental pain at the time of data collection. Further, a national  
106 survey on oral health in Kenya reported that nearly all (99.9%) the adult participants had  
107 experienced one form of dental-related disorder in the previous one year [22]. Another study

108 conducted in parts of western Kenya reported that nearly 9 in 10 (86.3%) elderly persons had lost  
109 six lower front teeth due to a cultural custom [23].

110 Furthermore, dental disorders have been documented to adversely impact the health and  
111 wellbeing of the elderly. A study conducted in southern Brazil reported that toothache affected  
112 sleeping, talking, cleaning of teeth, eating and emotional state among elderly persons [24].

113 Additionally, complete tooth loss (edentulism) has been reported to cause cognitive and physical  
114 impairment in among the elderly and associated with reduced longevity in several studies [25,  
115 26]. Dental disorders have also been reported to compromise food intake leading to malnutrition  
116 with its sequelae of systemic diseases [27]. A meta-analysis by Toniazzo and others [28] in 2018  
117 associated edentulism with poor nutrition among the elderly across several studies.

118 Moreover, dental diseases share several risk factors with other noncommunicable diseases  
119 including excess sugar consumption, tobacco use and harmful use of alcohol hence their  
120 prevalence in the population often signify risk of multimorbidity [29]. A global study involving  
121 39 countries reported that the loss teeth predicted cardiovascular outcomes including  
122 cardiovascular death and stroke [30]. Low health literacy surrounding oral hygiene, and dental  
123 health in particular, also contributes to a lifestyle of not being aware of or prioritizing dental  
124 health in most African communities [31, 32, 33], and such, among other factors, could lead to  
125 cumulative burden of disease over the years which could be extremely profound in this  
126 population segment [3].

127 Self-rated dental health closely mimic actual clinical dental health status [34]. However, since  
128 dental health exists as a subset of oral health, which extends beyond dental outcomes to include  
129 the health of the entire oro-facial system [35], self-rated dental health is mostly studied alongside

130 self-rated oral health with some surveys publishing it as self-rated oral health even if the  
131 variables studied only relate to teeth and gums [36].  
132 The impact of dental disorders on self-rated dental health however remains understudied  
133 particularly in Kenya as in most other African countries [37]. This study assessed dental  
134 disorders and their impact on self-rated dental health of the elderly in select rural communities of  
135 Homa Bay County, Western Kenya.

## 136 **Materials and Methods**

### 137 **Study Design and Setting**

138 This was cross-sectional quantitative study conducted in North Karachuonyo ward of Homa Bay  
139 County. The County is situated in South-Western Kenya and is administered by eight sub-counties,  
140 40 wards, 23 divisions, 140 locations and 265 sub-locations [38]. North Karachuonyo ward is  
141 situated within the GPS coordinates **-0.364015, 34.54282** and comprised four community  
142 administrative locations. The ward is characterized by poor access to improved water and  
143 sanitation with 99% of water sources being unimproved (mainly ponds) and 20% of the population  
144 practicing open defecation [39]. Educational levels are arguably suboptimal with 19% of the  
145 population having no formal education and majority (62.8%) having no more than primary  
146 education. Furthermore 18% of the population are either retired or homemakers and 7.4% have no  
147 gainful employment [39].

148

### 149 **Sampling**

150 The sample size was determined using Yamane’s (1967) formula based on a study population of  
151 1159, confidence level of 95%, and 5% precision. Participants were eligible for the study if they  
152 were aged 65 years and over, resided in the study area and gave consent to participate.  
153 Proportionate stratified sampling was used in order to ensure equitable sample distribution across  
154 all the four locations. The population was stratified by the four locations and the proportion to be  
155 included in the final sample ( $i$ ) was then calculated using the formula:

$$i = \left( \frac{n_i}{N} \right) * n$$

156  
157 Where,  $n_i$  = number of eligible participants in the location,

158  $N$  = total number of eligible participants in all the locations (i.e. study population)

159  $n$  = the predetermined sample size (300)

160 This yielded a sub-sample distribution as indicated in table 1. Further to this simple random  
161 sampling was used to recruit participants.

162 *Table 1: distribution of sample population across selected community administrative units*

| <b>Community Unit</b> | <b>Proportion</b> | <b>Sample</b> |
|-----------------------|-------------------|---------------|
| C1                    | (163/1159) * 300  | 43            |
| C2                    | (264/1159) * 300  | 68            |
| C3                    | (237/1159) * 300  | 61            |
| C4                    | (495/1159) * 300  | 128           |
| <b>Total</b>          |                   | <b>300</b>    |

163

## 164 **Measurements**

165 Data was collected between January and March 2020 through interviewer-administered  
166 questionnaires. The instrument collected data on socio-demographics, dental disorders and self-

167 rated dental health. Sociodemographic data included age, gender, community unit, education,  
168 occupational history, household composition and self-rated economic status. Dental disorders  
169 assessed included self-reported dental pain, tooth extraction, tooth mobility, cavities gingival  
170 bleeding and dental trauma within the past one year. Self-rated dental health was assessed by a  
171 single question, “How would you rate your dental health?” with four response options; *very poor*,  
172 *poor*, *good*, *very good*. The instrument was initially drafted in English based on study objectives  
173 and a review of literature, translated into the local dialect (*Dholuo*), then back translated to English  
174 and pre-tested for reliability in a pilot study with 30 respondents. The instrument’s internal  
175 consistency reliability was assessed by computing Cronbach’s  $\alpha$  coefficient for related constructs  
176 which yielded a value of 0.77. Those included in the pretest were excluded in the main study. Data  
177 was gathered through home visits with the help of trained research assistants who were community  
178 health workers.

## 179 **Ethics Statement**

180 The study protocol was reviewed and approved by the Institutional Ethics Review Committee of  
181 the University of Eastern Africa, Baraton (IRB no. UEAB/REC/21/10/2019). In compliance with  
182 Kenyan standards, additional approval was granted by the Kenya National Commission for  
183 Science, Technology and Innovation (NACOSTI) as well as the Homa Bay County director of  
184 education. Written informed consent was obtained from all the study participants before enlisting  
185 them in the study. A written consent form was provided along with the questionnaire which the  
186 participants were obligated to read and accept or reject in witness of the research assistant. Those  
187 who were unable to read had the consent form read out to them by the research assistant. Only  
188 those who gave consent were included in the study. Furthermore, no physically invasive methods  
189 were employed in data collection as dental disorders were assessed through self-report.



## 190 **Data Analysis**

191 Descriptive statistics including frequencies and percentages were used to summarize  
192 sociodemographic data as well as the distribution of dental disorders. Sociodemographic data was  
193 disaggregated by gender. Pearson’s chi-square test ( $X^2$ ) for independence was used to compare  
194 distributional differences with alpha set at  $p \leq 0.05$ . Self-rated dental health was dichotomized into  
195 “good-very good/poor-very poor” from the original variable that had these four categories  
196 separately. The impact of dental disorders on self-rated dental health was estimated using the *phi*  
197 coefficient. Analyses were performed using IBM SPSS Statistics software version 26.0.

## 198 **Results**

### 199 **Sociodemographic characteristics**

200 Majority (64%) of the respondents were aged 65-74 years. Female respondents were more (55.3%)  
201 than males (44.75%). Most (56.7%) of the respondents had no more than primary education with  
202 about 3 in 10 (26.3%) having no formal education at all. There was statistically significant disparity  
203 in education with females constituting a majority (79%) of those without formal education and a  
204 minority (27%) of those with secondary education and above ( $p < 0.00001$ ). Further, 8 in 10 of the  
205 study sample never had any formal employment with nearly the same proportion (79.3%) self-  
206 rating their economic status as poor. Again there was statistically significant disparity in  
207 employment with females accounting for 60% of those that were never formally employed  
208 ( $p < 0.0001$ ). See table 1 for illustration.

209 Table 2: Sociodemographic characteristics of respondents

| Characteristic | Frequency <i>n</i> (%) | Chi square ( <i>p</i> -value) |
|----------------|------------------------|-------------------------------|
| Gender         |                        | ref                           |
| <i>Female</i>  | 166(55.3)              |                               |

|                                    |           |                     |
|------------------------------------|-----------|---------------------|
| <i>Male</i>                        | 134(44.7) |                     |
| Age                                |           | 3.775 (0.151)       |
| <i>65-74</i>                       | 194(64.7) |                     |
| <i>75-84</i>                       | 92(30.7)  |                     |
| <i>85 plus</i>                     | 14(4.7)   |                     |
| Community unit                     |           | 5.124 (0.163)       |
| <i>C1</i>                          | 128(42.7) |                     |
| <i>C2</i>                          | 43(14.3)  |                     |
| <i>C3</i>                          | 61(20.3)  |                     |
| <i>C4</i>                          | 68(22.7)  |                     |
| Formal Education                   |           | 35.704 (<0.00001) * |
| <i>None</i>                        | 79(26.3)  |                     |
| <i>Primary</i>                     | 170(56.7) |                     |
| <i>Secondary plus</i>              | 51(17.0)  |                     |
| Occupational history               |           | 16.467 (0.000049)   |
| <i>Never had formal employment</i> | 247(82.3) |                     |
| <i>Was formally employed</i>       | 53(17.7)  |                     |
| Household composition              |           | 7.751 (0.005)       |
| <i>Alone</i>                       | 38(12.7)  |                     |
| <i>With family</i>                 | 262(87.3) |                     |
| Economic Status                    |           | 7.125 (0.008)       |
| <i>Poor-very poor</i>              | 238(79.3) |                     |
| <i>Good-very good</i>              | 62(20.7)  |                     |

210 \*Exact *p*-value = 1.766E-8

211

## 212 **Prevalence of dental disorders**

213 As indicated in the table below, Table 2, over three-quarters (76%) of the respondents had  
 214 experienced dental pain within the last one year with dental trauma being the least occurring  
 215 dental disorder in the study sample (16%). Nearly 7 out of 10 (67%) respondents had lost at  
 216 least one tooth due to medical extraction whereas half of the respondents (52.3%) were having at  
 217 least one carious tooth at the time of data collection. Periodontal symptoms were equally  
 218 frequent in the study sample with 6 in 10 (60%) reporting gingival bleeding and nearly the same  
 219 proportion (56%) reporting at least one mobile tooth.

220 *Table 3: prevalence of dental disorders (frequency and percentages)*

| Disorder                   | Frequency<br>(n) | Percent<br>(%) |
|----------------------------|------------------|----------------|
| Dental Pain                |                  |                |
| <i>No</i>                  | 72               | 24.0           |
| <i>Yes</i>                 | 228              | 76.0           |
| Tooth extraction (medical) |                  |                |
| <i>No</i>                  | 99               | 33.0           |
| <i>Yes</i>                 | 201              | 67.0           |
| Cavities                   |                  |                |
| <i>No</i>                  | 143              | 47.7           |
| <i>Yes</i>                 | 157              | 52.3           |
| Gingival Bleeding          |                  |                |
| <i>No</i>                  | 120              | 40.0           |
| <i>Yes</i>                 | 180              | 60.0           |
| Tooth Mobility             |                  |                |
| <i>No</i>                  | 132              | 44.0           |
| <i>Yes</i>                 | 168              | 56.0           |
| Dental trauma              |                  |                |
| <i>No</i>                  | 252              | 84.0           |
| <i>Yes</i>                 | 48               | 16.0           |

221

222 **Relationship between dental disorders and self-rated dental health**

223 As indicated in the table below, Table 3, over 6 in 10 (63.3%) of the respondents rated their  
224 dental health as poor. Chi-square test indicted there was statistically significant relationship  
225 between dental disorders and self-rated dental health among the study respondents. Judging by  
226 the test statistic associated *p*-values and corresponding *phi* coefficient, tooth extraction had the  
227 strongest impact on self-rated dental health ( $X^2=27.818$ ,  $p<0.00001$ ,  $\phi = 0.305$ ) followed by  
228 tooth mobility ( $X^2=27.180$ ,  $p<0.00001$ ,  $\phi = 0.301$ ), gingival bleeding ( $X^2=19.378$ ,  $p=0.000011$ ,  
229  $\phi = 0.254$ ) and cavities ( $X^2=17.757$ ,  $p=0.000025$ ,  $\phi = 0.243$ ). Respondents' experience of dental  
230 trauma ( $X^2 = 9.843$ ,  $p= 0.002$ ,  $\phi = 0.181$ ) and dental pain ( $X^2 = 8.842$ ,  $p= 0.003$ ,  $\phi = 0.172$ ), and  
231 the degree of dental discoloration ( $X^2=10.992$ ,  $p=0.001$ ,  $\phi = 0.194$ ) had the least impact on self-  
232 rated dental health.

233 *Table 4: impact of dental disorders on self-rated dental health*

|                            | Self-rated dental health |                     | $X^2$ ( <i>p</i> -value)               | <i>Phi</i> coeff |
|----------------------------|--------------------------|---------------------|----------------------------------------|------------------|
| <i>N</i> = 300             | <i>good</i><br>(36.7%)   | <i>poor</i> (63.3%) |                                        |                  |
| Dental Pain                |                          |                     | 8.842 (0.003)                          | 0.172            |
| <i>no</i>                  | 37(51.4) <sup>^</sup>    | 35(48.6)            |                                        |                  |
| <i>yes</i>                 | 73(32.0)                 | 155(68.0)           |                                        |                  |
| Cavities                   |                          |                     | 17.757 (0.000025)                      | 0.243            |
| <i>no</i>                  | 70 (49.0)                | 73 (51.0)           |                                        |                  |
| <i>yes</i>                 | 40 (25.5)                | 117 (74.5)          |                                        |                  |
| Gingival bleeding          |                          |                     | 19.378 (0.000011)                      | 0.254            |
| <i>no</i>                  | 62(51.7)                 | 58(48.3)            |                                        |                  |
| <i>yes</i>                 | 48(26.7)                 | 132(73.3)           |                                        |                  |
| Tooth mobility             |                          |                     | 27.180<br>( $<0.00001$ ) <sup>*</sup>  | 0.301            |
| <i>no</i>                  | 70(53.0)                 | 62(47.0)            |                                        |                  |
| <i>yes</i>                 | 40(23.8)                 | 128(76.2)           |                                        |                  |
| Dental trauma              |                          |                     | 9.843 (0.002)                          | 0.181            |
| <i>no</i>                  | 102(40.5)                | 150(59.5)           |                                        |                  |
| <i>yes</i>                 | 8(16.7)                  | 40(83.3)            |                                        |                  |
| Tooth extraction (medical) |                          |                     | 27.818<br>( $<0.00001$ ) <sup>**</sup> | 0.305            |
| <i>no</i>                  | 57(57.6)                 | 42(42.4)            |                                        |                  |
| <i>yes</i>                 | 53(26.4)                 | 148(73.6)           |                                        |                  |
| Discoloration              |                          |                     | 10.992(0.001)                          | 0.194            |
| <i>slight</i>              | 68(46.9)                 | 77(53.1)            |                                        |                  |
| <i>very</i>                | 41(28.1)                 | 105(71.9)           |                                        |                  |

234 <sup>\*</sup>exact *p*-value = 1.8541E-7

235 <sup>\*\*</sup>exact *p*-value =1.3328E-7

236 <sup>^</sup>the row percentages are within categories of dental disorders

237

238

239

## 240 Discussion

241 Dental health is critical to general health and wellbeing of geriatric population, as it is considered

242 a basic human right and recognized as essential tenet in public health and a core indicator of

243 general health and quality of life [40, 41]. Notwithstanding, dental disorders remain a leading

244 geriatric disease in Kenya and other developing countries, compromising their self-expression,  
245 nutrition and general psychological and social wellbeing [24, 42, 43].

246 This study investigated the impact of dental health disorders on self-rated dental health among  
247 the elderly in parts of rural Kenya. The findings of this study showed that there was a high  
248 prevalence of dental disorders among the elderly with dental pain having been experienced by  
249 nearly 8 in 10 (76%). Compared to other studies, the prevalence of dental pain in this study was  
250 higher than those reported among the elderly in Hong Kong (62%) [44], India (39%) [45], Brazil  
251 (32%) [24] and a low of 19% in South Africa [46].

252 Notably, reported tooth mobility prevalence in this study (56.0%) was comparable to those  
253 reported in the US (56.5%) but lower than those reported in parts of Africa (91.0%), while the  
254 prevalence of gingival bleeding (60.0%) was higher than those reported among the elderly in parts  
255 of China (57.8%) and Egypt (52%) [11-12, 47-48]. In literature, these conditions are a hallmark of  
256 periodontal disease which is among the leading dental disorder among the elderly [47, 48].

257 Furthermore, the prevalence of cavities in this study (52.3%) was higher than those reported in  
258 parts of India (41.9%); Malawi (49.0%) and the US (47.0%) [9, 10, 13], but lower than reported  
259 in parts of china (67.5%) [47]. Again, this study found that nearly 7 in 10 (67%) had lost at least a  
260 tooth to medical extraction. In literature, medical tooth extraction is generally attributed to  
261 untreated dental caries and periodontal disease [50-52]. This finding therefore indicate that the  
262 elderly in the study population could have endured or neglected these conditions and only visited  
263 dentists too late in the natural history of the diseases. Some researchers have argued that such  
264 prevalence of dental disorders indicate that large proportion of the elderly either lack access to or  
265 neglect to utilize effective oral healthcare programs [53].

266 Self-rated dental health closely mimic actual dental health status and is recommended for socio-  
267 dental assessment particularly among the elderly in low-resource settings [54]. However, since  
268 dental health exists as a subset of oral health, which extends beyond dental outcomes to include  
269 the health of the entire oro-facial system [35], self-rated dental health is mostly studied alongside  
270 self-rated oral health with some surveys publishing it as self-rated oral health even if the  
271 variables studied only relate to teeth and gums [36]. Previous studies have validated the use of  
272 this technique in various settings and study populations [54]. Lundbeck and others, for instance,  
273 conducted a study in 2020 among elderly New Zealanders to determine the clinical validity of  
274 self-rated oral health. The study concluded that self-rated oral health accurately depicted the  
275 clinical oral health status [55].

276 In this study, more than 6 in 10 (63.3%) respondents self-rated their dental health as poor. This  
277 was in stark contrast to findings in some higher income countries such as United States (28%)  
278 [53], Japan (40%) [56] and Kingdom of Saudi Arabia (24%) [57] but comparable to Thailand  
279 (67%) [54]. This is likely because of better access to oral care resulting in better oral health  
280 outcomes among the elderly in HICs compared to middle income countries. Studies have  
281 consistently reported better general and oral health outcomes in HICs.

282 Notwithstanding, Locker and two others argued in a landmark study on self-ratings of oral health  
283 that other frames of reference impact self-rated oral health in addition to current oral problems  
284 [58]. The authors posited that such factors as respondent's emotional or physical state, their  
285 demographic characteristics, socioeconomic status, underlying diseases, as well as health-related  
286 behaviors are all frames of reference and could impact their self-rating of oral health. This study  
287 therefore undertook to establish the specific impact that dental disorders have on self-rated dental  
288 health. The findings revealed that dental disorders disproportionately but significantly impacted

289 respondents' self-rating of oral health status. The overall impact of dental disorders on  
290 respondents' self-rated oral health however appeared quite marginal considering the  
291 corresponding effect size, but we cannot make any conclusive assertions on this considering the  
292 scope and design of this study.

293 Medically driven tooth loss had the strongest impact on self-rated dental health ( $\phi = 0.305$ ,  
294  $p < 0.00001$ ) followed by tooth mobility ( $\phi = 0.301$ ,  $p < 0.00001$ ), gingival bleeding ( $\phi = 0.254$ ,  
295  $p = 0.000011$ ) and cavities ( $\phi = 0.243$ ,  $p = 0.000025$ ), whereas respondents' experience of dental  
296 trauma ( $\phi = 0.181$ ,  $p = 0.002$ ) and dental pain ( $\phi = 0.172$ ,  $p = 0.003$ ) had the least impact on self-  
297 rated dental health. According to the interpretational principles for  $\phi$  espoused by Akoglu (2018)  
298 [59], tooth extraction and tooth mobility had strong impact on self-rated dental health, with the  
299 rest having moderate to high impact. These findings suggest that the elderly in rural communities  
300 in Kenya value tooth retention therefore any loss of teeth, particularly on medical grounds,  
301 strongly impact their perception of oral wellbeing. This interpretation is further supported by the  
302 finding that tooth mobility came a close second to tooth loss on impact in the sense that the  
303 participants could have perceived any mobile tooth as a step toward tooth loss.

304 Furthermore, respondents' degree of dental discoloration also had an impact on their self-rated  
305 dental health ( $\phi = 0.194$ ,  $p = 0.001$ ) suggesting that even dental aesthetics was a concern among  
306 the studied population. This finding contrasts the findings of a study conducted in Nigeria [60]  
307 which concluded that dental discoloration and the desire to medically treat it was only significant  
308 among the younger age-groups. Our findings suggest that the African elderly population is  
309 mindful of their tooth color and probably just lack access to dental aesthetics.

310 This study was not without limitations. First, since the design was cross-sectional, it was not  
311 possible to establish cause-effect relationship. Secondly, dental disorders were assessed through

312 self-report which, though an established methodology, is not as robust as clinical examination.  
313 Lastly, this study focused on the bivariate relationship between explanatory and outcome  
314 measures therefore the impact of any possible extraneous variables was not explored.  
315 Nonetheless this study's findings offer insightful evidence as regards the differential impact of  
316 dental disorders on self-rated dental health among older adults in rural Kenya and is to the best  
317 of our knowledge the first of its kind.

## 318 **Conclusion**

319 This study investigated the impact of dental disorders on self-rated dental health among the  
320 elderly in rural communities in Kenya. The study established that dental disorders significantly  
321 but differentially impacted self-rated dental health of the elderly, with tooth loss and tooth  
322 mobility being the leading disorders in impact. Addressing the causes of these disorders among  
323 the elderly in Kenya is critical to improving oral health and wellbeing.

## 324 **References**

- 325 1. World Health Organization. Ageing and health [Internet]. 2022 [cited 2023 Dec 4]. Available  
326 from: <https://www.who.int/news-room/fact-sheets/detail/ageing-and-health>
- 327 2. Defo BK. Demographic, epidemiological, and health transitions: are they relevant to  
328 population health patterns in Africa? *Global Health Action*. 2014 Dec 1;7(1):22443.
- 329 3. Kowal P, Corso B, Anindya K, Andrade FCD, Giang TL, Guitierrez MTC, et al. Prevalence of  
330 unmet health care need in older adults in 83 countries: measuring progressing towards universal  
331 health coverage in the context of global population ageing. *Population Health Metrics*. 2023 Sep  
332 15;21(1):15.
- 333 4. Wandera SO, Kwagala B, Ntozi J. Determinants of access to healthcare by older persons in  
334 Uganda: a cross-sectional study. *International Journal for Equity in Health*. 2015 Mar 7;14(1):26.



- 335 5. World Health Organization | Regional Office for Africa. 2023 [cited 2024 Mar 11]. Africa  
336 burdened with largest global increase of oral diseases. Available from:  
337 <https://www.afro.who.int/news/africa-burdened-largest-global-increase-oral-diseases>
- 338 6. Agarwalla R, Saikia AM, Baruah R. Assessment of the nutritional status of the elderly and its  
339 correlates. *J Family Community Med.* 2015;22(1):39–43.
- 340 7. Kenya National Bureau of Statistics. Kenya 2009 population and housing Census: Analytical  
341 report on population projections. In Kenya National Bureau of Statistics.; 2011.
- 342 8. Gil-Montoya JA, Mello ALF de, Barrios R, Gonzalez-Moles MA, Bravo M. Oral health in the  
343 elderly patient and its impact on general well-being: a nonsystematic review. *Clinical*  
344 *Interventions in Aging.* 2015;10:461.
- 345 9. Agrawal R, Gautam NR, Kumar PM, Kadhiresan R, Saxena V, Jain S. Assessment of Dental  
346 Caries and Periodontal Disease Status among Elderly Residing in Old Age Homes of Madhya  
347 Pradesh. *J Int Oral Health.* 2015 Aug;7(8):57–64.
- 348 10. Kohli R, Sehgal HS, Nelson S, Schwarz E. Oral health needs, dental care utilization, and  
349 quality of life perceptions among Oregonian seniors. *Special Care in Dentistry.* 2017;37(2):85–  
350 92.
- 351 11. Huang Q, Dong X. Prevalence of periodontal disease in middle-aged and elderly patients and  
352 its influencing factors. *Am J Transl Res.* 2022 Aug 15;14(8):5677–84.
- 353 12. Mohamed HG, Mustafa K, Ibrahim SO, Åström AN. Dietary habits, oral impact on daily  
354 performance and type 2 diabetes: a matched case-control study from Sudan. *Health and Quality*  
355 *of Life Outcomes.* 2017 May 22;15(1):111.
- 356 13. Msyamboza KP, Phale E, Namalika JM, Mwase Y, Samonte GC, Kajirime D, et al.  
357 Magnitude of dental caries, missing and filled teeth in Malawi: National Oral Health Survey.  
358 *BMC Oral Health.* 2016 Mar 9;16:29.
- 359 14. Ogunbodede EO. Population ageing and the implications for oral health in Africa.  
360 *Gerodontology.* 2013;30(1):1–2.
- 361 15. World Health Organization, Regional Committee for Africa. 2016 [cited 2019 Jun 10].  
362 Regional oral health strategy 2016–2025: addressing oral diseases as part of noncommunicable  
363 diseases: report of the Secretariat. Available from: <https://apps.who.int/iris/handle/10665/250994>
- 364 16. Ishikawa T, Oiwa M, Minami E, Mieda H, Sato S, Ishii M, et al. Tooth Mobility Evaluation -  
365 A Comparison with Dental Assessment. *Masui.* 2017 Apr;66(4):387–9.
- 366 17. Abid A, Maatouk F, Berrezouga L, Azodo C, Uti O, El-Shamy H, et al. Prevalence and  
367 Severity of Oral Diseases in the Africa and Middle East Region. *Adv Dent Res.* 2015 Jul  
368 1;27(1):10–7.

- 369 18. United Nations Department of Economic and Social Affairs. [cited 2024 May 6]. Income  
370 Poverty in Old Age: an Emerging Development Priority. Available from:  
371 <https://www.un.org/esa/socdev/ageing/documents/PovertyIssuePaperAgeing.pdf>
- 372 19. Mapoma CC, Masaiti G. Social Isolation and Aging in Zambia: Examining the Possible  
373 Predictors. *J Aging Res.* 2012;2012:537467.
- 374 20. Mussie KM, Setchell J, Elger BS, Kaba M, Memirie ST, Wangmo T. Care of Older Persons  
375 in Eastern Africa: A Scoping Review of Ethical Issues. *Front Public Health.* 2022 Jul  
376 6;10:923097.
- 377 21. Crouch S, Dzingle J, Tyus J, Kapila S, Eber R, Ndege PK, et al. Oral Health Status of Adults  
378 in Rural Meru, Kenya. 2016;15(1):9.
- 379 22. Gathece L. Kenya National Oral Health Survey Report 2015 [Internet]. Ministry of Health,  
380 Unit of Oral Health. Kenya; 2015 [cited 2015 Jun 25]. Available from:  
381 [https://profiles.uonbi.ac.ke/gathece/files/kenya\\_national\\_oral\\_health\\_survey\\_report\\_2015\\_0.pdf](https://profiles.uonbi.ac.ke/gathece/files/kenya_national_oral_health_survey_report_2015_0.pdf)
- 382 23. Hayashi Y. Oral Hygiene Status among the Elderly in an Area with Limited Access to Dental  
383 Services in a Rural Kenyan Community. *JDOH.* 2017 Jan 7;4(1):1–5.
- 384 24. Cavaleiro CH, Abegg C, Fontanive VN, Davoglio RS, Cavaleiro CH, Abegg C, et al.  
385 Dental pain, use of dental services and oral health-related quality of life in southern Brazil.  
386 *Brazilian Oral Research* [Internet]. 2016 [cited 2019 Feb 7];30(1). Available from:  
387 [http://www.scielo.br/scielo.php?script=sci\\_abstract&pid=S1806-](http://www.scielo.br/scielo.php?script=sci_abstract&pid=S1806-83242016000100272&lng=en&nrm=iso&tlng=en)  
388 [83242016000100272&lng=en&nrm=iso&tlng=en](http://www.scielo.br/scielo.php?script=sci_abstract&pid=S1806-83242016000100272&lng=en&nrm=iso&tlng=en)
- 389 25. Tsakos G, Watt RG, Rouxel PL, Oliveira C de, Demakakos P. Tooth Loss Associated with  
390 Physical and Cognitive Decline in Older Adults. *Journal of the American Geriatrics Society.*  
391 2015;63(1):91–9.
- 392 26. Friedman PK, Lamster IB. Tooth loss as a predictor of shortened longevity: exploring the  
393 hypothesis. *Periodontology 2000.* 2016 Oct 1;72(1):142–52.
- 394 27. Gondivkar SM, Gadbail AR, Gondivkar RS, Sarode SC, Sarode GS, Patil S, et al. Nutrition  
395 and oral health. *Disease-a-Month* [Internet]. 2018 Oct 4 [cited 2019 Mar 6]; Available from:  
396 <http://www.sciencedirect.com/science/article/pii/S0011502918301287>
- 397 28. Toniazzi MP, Amorim P de S, Muniz FWMG, Weidlich P. Relationship of nutritional status  
398 and oral health in elderly: Systematic review with meta-analysis. *Clinical Nutrition.* 2018 Jun  
399 1;37(3):824–30.
- 400 29. Jin L, Lamster I, Greenspan J, Pitts N, Scully C, Warnakulasuriya S. Global burden of oral  
401 diseases: emerging concepts, management and interplay with systemic health. *Oral Diseases.*  
402 2016 Oct 1;22(7):609–19.

- 403 30. Vedin O, Hagström E, Budaj A, Denchev S, Harrington RA, Koenig W, et al. Tooth loss is  
404 independently associated with poor outcomes in stable coronary heart disease. *Eur J Prev*  
405 *Cardiol.* 2016 May 1;23(8):839–46.
- 406 31. Al-Batayneh OB, Owais AI, Khader YS. Oral Health Knowledge and Practices among  
407 Diverse University Students with Access to Free Dental Care: A Cross-Sectional Study. *Open*  
408 *Journal of Stomatology.* 2014 Mar 5;4(3):135–42.
- 409 32. Amanu A A, Godesso A, Birhanu Z. Health Literacy in Ethiopia: Evidence Synthesis and  
410 Implications. *Journal of Multidisciplinary Healthcare.* 2023 Dec 31;16:4071–89.
- 411 33. Shomuyiwa DO, Bridge G. Oral health of adolescents in West Africa: prioritizing its social  
412 determinants. *Global Health Research and Policy.* 2023 Jul 19;8(1):28.
- 413 34. Abbood HM, Hinz J, Cherukara G, Macfarlane TV. Validity of Self-Reported Periodontal  
414 Disease: A Systematic Review and Meta-Analysis. *Journal of Periodontology.* 2016 Dec  
415 1;87(12):1474–83.
- 416 35. Dickson-Swift V, Kenny A, Farmer J, Gussy M, Larkins S. Measuring oral health literacy: a  
417 scoping review of existing tools. *BMC Oral Health [Internet].* 2014 Dec 4 [cited 2019 May  
418 30];14. Available from: <https://www.ncbi.nlm.nih.gov/pmc/articles/PMC4417207/>
- 419 36. Sousa JL de, Henriques A, Silva ZP da, Severo M, Silva S. [Socioeconomic position and  
420 self-rated oral health in Brazil: results of the Brazilian National Health Survey]. *Cad Saude*  
421 *Publica.* 2019 May 30;35(6):e00099518.
- 422 37. Pengpid S, Peltzer K. Self-rated oral health status and social and health determinants among  
423 community dwelling adults in Kenya. *Afr Health Sci.* 2019 Dec;19(4):3146–53.
- 424 38. County Government of Homa bay. (2018). *Second County Integrated Development Plan 2018- 2022*  
425 *(Draft)*. County Government of Homa bay. Available from: [http://www.homabayassembly.go.ke/wp-](http://www.homabayassembly.go.ke/wp-content/uploads/bsk-pdf-manager/2018/05/HB-draft5-CIDP-2018-2022-15-5-2018.pdf)  
426 [content/uploads/bsk-pdf-manager/2018/05/HB-draft5-CIDP-2018-2022-15-5-2018.pdf](http://www.homabayassembly.go.ke/wp-content/uploads/bsk-pdf-manager/2018/05/HB-draft5-CIDP-2018-2022-15-5-2018.pdf)
- 427 39. Kenya National Bureau of Statistics [2014, November 6]. ‘Exploring Kenya’s Inequality: Pulling Apart  
428 or Pooling Together?’ Available from: [http://inequalities.sidint.net/kenya/wp-](http://inequalities.sidint.net/kenya/wp-content/uploads/sites/2/2013/09/HomaBay.pdf)  
429 [content/uploads/sites/2/2013/09/HomaBay.pdf](http://inequalities.sidint.net/kenya/wp-content/uploads/sites/2/2013/09/HomaBay.pdf)
- 430 40. Martínez GR, Albuquerque A. The right to oral health in the Declaration of Liverpool.  
431 *Revista Bioética.* 2017 Aug;25(2):224–33.
- 432 41. Yap A. Oral Health Equals Total Health: A Brief Review. *Journal of Dentistry Indonesia.*  
433 2017 Aug 31;24(2):59-62–62.
- 434 42. Vasthare R, Ankola AV, Ran ALY, Mansingh P. Geriatric oral health concerns, a dental  
435 public health narrative. *International Journal Of Community Medicine And Public Health.* 2019  
436 Jan 24;6(2):883–8.

- 437 43. Tonetti MS, Jepsen S, Jin L, Otomo-Corgel J. Impact of the global burden of periodontal  
438 diseases on health, nutrition and wellbeing of mankind: A call for global action. *Journal of*  
439 *Clinical Periodontology*. 2017 May 1;44(5):456–62.
- 440 44. Wan KY, McMillan AS, Wong MC. Orofacial pain symptoms and associated disability and  
441 psychosocial impact in community-dwelling and institutionalized elderly in Hong Kong.  
442 *Community Dent Health*. 2012 Mar;29(1):110–6.
- 443 45. Salunke S, Shah V, Ostbye T, Gandhi A, Phalgune D, Ogundare MO, et al. Prevalence of  
444 dental caries, oral health awareness and treatment-seeking behavior of elderly population in rural  
445 Maharashtra. *Indian J Dent Res*. 2019;30(3):332–6.
- 446 46. Ayo-Yusuf IJ, Naidoo S. Social gradient in the cost of oral pain and related dental service  
447 utilisation among South African adults. *BMC Oral Health*. 2016 Nov 5;16(1):117.
- 448 47. Chatzopoulos GS, Cisneros A, Sanchez M, Lunos S, Wolff LF. Validity of self-reported  
449 periodontal measures, demographic characteristics, and systemic medical conditions. *Journal of*  
450 *Periodontology*. 2018 Aug 1;89(8):924–32.
- 451 48. Ghayth EI, Fahmy HD, El-moghrab NM, Abd El-Aziz NM. Knowledge and Reported  
452 Practice Among Elderly With Oral and Dental Problems at Assiut City, Egypt. *Assiut Scientific*  
453 *Nursing Journal*. 2019 Jun 1;7(17):102–12.
- 454 49. Liu L, Zhang Y, Wu W, Cheng M, Li Y, Cheng R. Prevalence and Correlates of Dental  
455 Caries in an Elderly Population in Northeast China. *PLoS One* [Internet]. 2013 Nov 19 [cited  
456 2019 Feb 6];8(11). Available from: <https://www.ncbi.nlm.nih.gov/pmc/articles/PMC3833987/>
- 457 50. Muhammad Ali S, Shaaban Mustafa N, Ali Kashmoola M, Myo Han T. Reasons and pattern  
458 of tooth extraction in International Islamic University Malaysia, Kulliyyah of Dentistry  
459 Polyclinic. *Materials Today: Proceedings*. 2019 Jan 1;16:2280–4.
- 460 51. Alesia K, Khalil HS. Reasons for and patterns relating to the extraction of permanent teeth in  
461 a subset of the Saudi population. *Clin Cosmet Investig Dent*. 2013 Jul 30;5:51–6.
- 462 52. Udoye CI, Jafarzadeh H, Kinoshita JI, Manabe A, Kobayashi M. Prevalence and Reasons for  
463 Extraction of Endodontically Treated Teeth in Adult Nigerians. *J Contemp Dent Pract*. 2018 Dec  
464 1;19(12):1469–73.
- 465 53. Northridge ME, Chakraborty B, Kunzel C, Metcalf S, Marshall S, Lamster IB. What  
466 contributes to self-rated oral health among community-dwelling older adults? Findings from the  
467 ElderSmile program. *Journal of Public Health Dentistry*. 2012;72(3):235–45.
- 468 54. Sermsuti-anuwat N, Nampikul N, Suwannimit R, Panthueng W. Self-rated oral health among  
469 elderly patients attending a university dental hospital in Thailand: a telephone-based cross-  
470 sectional survey study. *PeerJ*. 2022 Oct 10;10:e14191.

- 471 55. Lundbeck HJ, Smith MB, Thomson WM. Clinical validity of self-rated oral health among  
472 New Zealand nursing home residents. *Gerodontology*. 2020;37(3):253–7.
- 473 56. Ohara Y, Hirano H, Watanabe Y, Obuchi S, Yoshida H, Fujiwara Y, et al. Factors associated  
474 with self-rated oral health among community-dwelling older Japanese: A cross-sectional study.  
475 *Geriatrics & Gerontology International*. 2015;15(6):755–61.
- 476 57. Kotha SB, Chaudhary M, Terkawi S, Ahmed M, Ghabban SN, Fernandez RAA. Correlation  
477 of Perceived Self-Rated Oral Health Status with Various Dental Health and Awareness Factors. *J*  
478 *Int Soc Prev Community Dent*. 2017 Oct;7(Suppl 2):S119–24.
- 479 58. Locker D, Maggirias J, Wexler E. What Frames of Reference Underlie Self-Ratings of Oral  
480 Health?\*. *Journal of Public Health Dentistry*. 2009;69(2):78–89.
- 481 59. Akoglu H. User's guide to correlation coefficients. *Turk J Emerg Med*. 2018 Aug 7;18(3):91-93. doi:  
482 10.1016/j.tjem.2018.08.001. PMID: 30191186; PMCID: PMC6107969.
- 483 60. Enabulele JE, Omo JO. Self perceived satisfaction with dental appearance and desired treatment to  
484 improve aesthetics. *African Journal of Oral Health*. 2017;7(1):1–7.

485  
486

487 **Author Contributions:** W.A—conceptualized the study and significantly worked on the manuscript,  
488 revised, and provided approval for submission. F.N.-manuscript preparation, and revisions on all drafts. All  
489 authors have read and agreed to the published version of the manuscript.

490 **Funding:** This research received no external funding.

491 **Institutional Review Board Statement:** The study was conducted according to the guidelines of the  
492 Declaration of Helsinki and approved by the Ethics Committee of the University of Eastern Africa,  
493 Baraton (IRB no. UEAB/REC/21/10/2019).

494 **Informed Consent Statement:** Informed consent was obtained from all subjects involved in the study by  
495 signing a consent form that had explanation on the voluntary participation and purpose of the study  
496 explained to them.

497 **Data Availability Statement:** The datasets used and/or analyzed during the current study are contained  
498 within this article. Any additional data or clarification available upon reasonable request.

499 **Acknowledgments:** We are grateful to all the research assistants and field coordinators who helped with  
500 the study. We acknowledge participation of those who accepted to be interviewed for their time and shared  
501 experiences with us.

502 **Conflicts of Interest:** None declared.
